# Supplementary material for: Pollinators drive floral evolution in an Atlantic Forest genus
Source: PubMed Central journal article supplement (PMC7532729; doi:10.1093/aobpla/plaa046), 2020-08-22
Supplement: plaa046_suppl_supplementary_material.pdf [file plaa046_suppl_supplementary_material.pdf]

## Pollinators drive floral evolution in an Atlantic Forest genus

Beatriz Neves, Igor M. Kessous, Ricardo L. Moura, Dayvid R. Couto, Camila M. Zanella,  
Alexandre Antonelli, Christine D. Bacon, Fabiano Salgueiro and Andrea F. Costa

### Supporting Information

**Table S1.** Taxa sampled for chloroplast (*rps16-trnK* and *matK*) and nuclear (*PHYC*) regions, assigned to their respective pollination syndrome. Geographical coordinates, altitude, voucher information and Genbank accession are given.

| Pollination syndrome         | Species                                                  | Geographical coordinate<br>Latitude / Longitude |           | Altitude<br>(m) | Voucher               | GeneBank accession<br>( <i>rps16-trnK</i> , <i>matK</i> , <i>PHYC</i> ) |
|------------------------------|----------------------------------------------------------|-------------------------------------------------|-----------|-----------------|-----------------------|-------------------------------------------------------------------------|
|                              | <i>Alcantarea imperialis</i>                             | -22.4603                                        | -42.99556 | 1246            | Kessous 178 (R)       | MN203393, MN203299, MN203223                                            |
|                              | <i>A. regina</i>                                         | -22.9536                                        | -43.16333 | 35              | B100171454            | MN203395, KX754111, KX753978                                            |
|                              | <i>Stigmatodon croceanus</i>                             | -21.9508                                        | -41.94722 | 810             | Leme 4316 (HB)        | MN203417, KX754200, KX754067                                            |
| Outgroup- bats and hawkmoths | <i>S. harrylutheri</i>                                   | -                                               | -         | -               | Leme 8026 (HB)        | MN203422, KX754219, KX754086                                            |
|                              | <i>S. plurifolius</i>                                    | -                                               | -         | -               | Araújo s.n. (HB72850) | MN203424, KX754154, KX754021                                            |
|                              | <i>S. costae</i>                                         | -                                               | -         | -               | Silva 115 (RB)        | MN20341, MN203311, -                                                    |
|                              | <i>Vriesea</i> (' <i>Stigmatodon</i> ') <i>oligantha</i> | -                                               | -         | -               | Couto 3127 (R)        | MN20347, MN203366, -                                                    |

|                          |                                                |          |           |      |                         |                              |
|--------------------------|------------------------------------------------|----------|-----------|------|-------------------------|------------------------------|
|                          | <i>V. agostiniana</i>                          | -23.5714 | -45.49222 | 150  | Kessous 154 & Pinto (R) | MN203434, MN203325, MN203245 |
|                          | <i>V. amethystina</i>                          | -22.9403 | -43.28917 | 500  | Ribeiro s.n. (R1999085) | MN203435, MN203326, MT874418 |
|                          | <i>V. billbergioides</i>                       | -22.4533 | -43.02    | 1883 | Couto 3069 (R)          | MT874420, MT874385, MT874405 |
|                          | <i>V. botafogensis</i>                         | -22.9719 | -43.02556 | 150  | França 25(R)            | MT874421, MT874386, MT874406 |
|                          | <i>V. cacuminis</i>                            | -21.6958 | -43.89666 | 1428 | Couto 2819 (R)          | MN203440, MN203331, MN203248 |
|                          | <i>V. calimaniiana</i>                         | -20.3683 | -41.2439  | 1450 | Neves 354 (R)           | MT874422, MT874387, MT874407 |
|                          | <i>V. capixabae</i>                            | -20.445  | -41.73611 | 736  | Venda16 (RBvb)          | MN203441, MN203332, MN203249 |
|                          | <i>V. carinata</i> var. <i>carinata</i>        | -19.9669 | -40.53472 | 671  | Neves 294 (R)           | MT874423, MT874388, MT874408 |
| Vriesea-<br>hummingbirds | <i>V. carinata</i> var. <i>flavominiata</i>    | -20.1767 | -40.91861 | 1200 | Neves 304 (R)           | MN203444, MN203335, MN203252 |
|                          | <i>V. carinata</i> var. <i>mangaratibensis</i> | -22.6292 | -43.8981  | 130  | Leme 656 (HB)           | MN203445, MN203336, MN203253 |
|                          | <i>V. duvaliana</i>                            | -14.3861 | -39.03528 | 1    | Neves 278 (R)           | MN203447, MN203339, MN203256 |
|                          | <i>V. eltoniana</i>                            | -22.9942 | -41.98694 | 300  | Neves186 (R)            | MN203448, MN203340, MN203257 |
|                          | <i>V. ensiformis</i> var. <i>ensiformis</i>    | -25.0747 | -47.92472 | 5    | Kessous 164 & Pinto (R) | MN203450, MN203342, MN203259 |
|                          | <i>V. ensiformis</i> var. <i>ensiformis</i>    | -25.1911 | -48.29972 | 100  | Kessous 240 (R)         | MT874424, MT874389, MT874409 |
|                          | <i>V. ensiformis</i> var. <i>ensiformis</i>    | -8.37278 | -36.02556 | 996  | Kessous 79 (R)          | MT874425, MT874390, MT874410 |
|                          | <i>V. ensiformis</i> var. <i>ensiformis</i>    | -26.3706 | -49.32028 | 437  | Kessous 247(R)          | MT874426, MT874391, -        |
|                          | <i>V. ensiformis</i> var. <i>bicolor</i>       | -23.62   | -45.41    | 150  | Kessous 155 & Pinto (R) | MN203449, MN203341, MN203258 |
|                          | <i>V. erythrodactylon</i>                      | -19.9669 | -40.53472 | 702  | Neves 296 (R)           | MN203451, MN203343, MN203260 |

---

|                              |          |           |      |                         |                              |
|------------------------------|----------|-----------|------|-------------------------|------------------------------|
| <i>V. flammea</i>            | -25.52   | -48.5092  | 1    | Kessous 238 & Neves (R) | MN203453, MN203345, MN203262 |
| <i>V. flammea</i>            | -24.099  | -48.365   | 103  | RB560880                | MN203446, MN203337, MN203254 |
| <i>V. flava</i>              | -25.3597 | -48.88389 | 218  | Kessous 245 & Neves (R) | MN203454, MN203346, MN203263 |
| <i>V. fluviatilis</i>        | -21.9575 | -41.94694 | 634  | Kessous103 (R)          | MT874427, MT874392, MT874411 |
| <i>V. fluviatilis</i>        | -22.3153 | -42.19028 | 69   | Kessous115 (R)          | MT874428, MT874393, MT874412 |
| <i>V. gracilior</i>          | -19.9711 | -40.53056 | 627  | Kessous 63 (R)          | MN203457, MN203348, -        |
| <i>V. gradata</i>            | -22.4781 | -43.14667 | 895  | Kessous 167 (R)         | MN203459, MN203351, MN203267 |
| <i>V. gutatta</i>            | -27.45   | -48.87    | 614  | Martinelli 14921 (RB)   | MN203461, MN203353, -        |
| <i>V. heterostachys</i>      | -22.4603 | -42.99556 | 1079 | Kessous 120 & Pinto (R) | MN203462, MN203354, MN203268 |
| <i>V. aff. heterostachys</i> | -25.0747 | -47.92472 | 5    | Kessous 165 (R)         | MT874419, MT874384, MT874404 |
| <i>V. inflata</i>            | -23.3558 | -45.11806 | 915  | Neves 377 (R)           | MN203464, MN203357, MN203271 |
| <i>V. aff. inflata</i>       | -22.8739 | -44.44861 | 494  | Neves 314 & Kessous (R) | MN203431, MN203322, MN203242 |
| <i>V. interrogatoria</i>     | -23.1989 | -44.98944 | 919  | Kessous 218 & Neves (R) | MN203465, MN203358, MN203272 |
| <i>V. lubbersi</i>           | -22.2456 | -43.7003  | 600  | RBvb469                 | MN203469, MN203362, MN203275 |
| <i>V. maxoniana</i>          | -        | -         | -    | Krömer 5597 (HEID)      | MN203470, KX754169, KX754036 |
| <i>V. modesta</i>            | -21.9508 | -41.94722 | 634  | Neves 343 (R)           | MN203472, MN203364, MN203277 |
| <i>V. neoglutinosa</i>       | -        | -         | -    | Baumgratz 35 (RB)       | MN203473, MN203365, MN203278 |
| <i>V. paraibica</i>          | -22.505  | -43.1786  | 922  | Uribbe 260 (R)          | MN203476, MN203368, MN203280 |

---

|                                         |          |           |      |                         |                              |
|-----------------------------------------|----------|-----------|------|-------------------------|------------------------------|
| <i>V. aff. procera</i>                  | -29.3756 | -49.75694 | 5    | Kessous 246 & Neves (R) | MN203433, MN203324, MN203244 |
| <i>V. psittacina</i>                    | -        | -         | -    | Barbosa 162 (RB)        | MN203478, MN203371, MN203283 |
| <i>V. recurvata</i>                     | -14.7761 | -39.08972 | 2    | Kessous 212 (R)         | MN203479, MN203371, -        |
| <i>V. repandostachys</i>                | -20.3749 | -40.65932 | 551  | Neves 349 (R)           | MN203479, MN203373, -        |
| <i>V. rhodostachys</i>                  | -19.9111 | -40.55278 | 627  | Neves 299 (R)           | MT874430, MT874395, MT874413 |
| <i>V. rhodostachys</i>                  | -15.1708 | -39.34972 | 141  | Leitman 268 (RB)        | MT874431, MT874396, MT874414 |
| <i>V. rodigasiana</i>                   | -25.0747 | -47.92472 | 5    | Moura 1013 (R)          | MN203481, MN203374, -        |
| <i>V. rubyae</i>                        | -22.5286 | -43.13527 | 895  | Neves 331 (R)           | MN203483, MN203376, MN203284 |
| <i>V. rubyae</i>                        | -23.0067 | -44.3181  | 272  | Moura 973 (R)           | MT874432, MT874397, MT874415 |
| <i>V. sandrae</i>                       | -12.8453 | -39.47528 | 150  | Neves 272 (R)           | MT874433, MT874398, -        |
| <i>V. saundersii</i>                    | -23.0008 | -43.28472 | 648  | WU4316                  | MN203485, AY614036, KX753894 |
| <i>V. scalaris</i> var. <i>scalaris</i> | -19.9111 | -40.55278 | 627  | Kessous 142 (R)         | MT874434, MT874399, MT874416 |
| <i>V. scalaris</i> var. <i>scalaris</i> | -25.52   | -48.5092  | 2    | Kessous 239 & Neves (R) | MN203487, MN203379, MN203286 |
| <i>V. scalaris</i> var. <i>viridis</i>  | -7.90306 | -36.0442  | 1001 | Kessous 189 (R)         | MN203488, MN203380, MN203287 |
| <i>V. seideliana</i>                    | -20.3756 | -40.65922 | 800  | Neves 348 (R)           | MN203489, MN203381, MN203288 |
| <i>V. simplex</i>                       | -19.9111 | -40.55278 | 627  | Kessous 137 (R)         | MN203490, MN203382, MN203289 |
| <i>V. simplex</i>                       | -23.3383 | -45.15    | 915  | Neves 368 (R)           | MT874435, MT874400, -        |
| <i>V. sucrei</i>                        | -22.9956 | -41.98611 | 356  | Neves 188 (R)           | MN203492, MN203384, MN203292 |

---

|                       |                                                 |          |           |      |                       |                              |
|-----------------------|-------------------------------------------------|----------|-----------|------|-----------------------|------------------------------|
|                       | <i>V. sucrei</i>                                | -20.3756 | -40.65922 | 800  | Neves 351 (R)         | MT874436, MT874401, -        |
|                       | <i>V. taritubensis</i> var. <i>brevisepala</i>  | -22.5153 | -43       | 646  | Neves 40 (R)          | MT874437, MT874402, -        |
|                       | <i>V. taritubensis</i> var. <i>patens</i>       | -23.3383 | -45.15    | 953  | Neves 191 (R)         | MN203477, MN203369, MN203294 |
|                       | <i>V. taritubensis</i> var. <i>taritubensis</i> | -23.0258 | -44.61306 | 45   | Neves 218 (R)         | MN203493, MN203385, MN203293 |
|                       | <i>V. teresopolitana</i>                        | -22.4122 | -42.9656  | 1000 | Neves 385 (R)         | MN203494, MN203386, MN203291 |
|                       | <i>V. vagans</i>                                | -22.8739 | -44.44861 | 494  | Kessous 225 (R)       | MT874438, MT874403, MT874417 |
|                       | <i>V. atra</i>                                  | -22.4122 | -42.9656  | 1007 | Moura 941 (R)         | MN203437, MN203328, MN203246 |
|                       | <i>V. bituminosa</i>                            | -22.461  | -43.02172 | 800  | Kessous 179 (R)       | MN203438, MN203329, MN203247 |
|                       | <i>V. fenestralis</i>                           | -22.7592 | -43.4511  | 393  | Lima 6485 (RB)        | MN203452, MN203344, MN203261 |
|                       | <i>V. fosteriana</i>                            | -20.6339 | -41.38139 | 845  | Moura 861 (R)         | MN203455, MN203347, MN203264 |
|                       | <i>V. gigantea</i>                              | -20.3633 | -40.6592  | 800  | Martinelli 15646 (RB) | MN203456, MN203348, MN203265 |
|                       | <i>V. grandiflora</i>                           | -22.0497 | -42.6747  | 528  | Moura 871 (R)         | MN203460, MN203352, -        |
| <i>Vriesea</i> - bats | <i>V. hydrophora</i>                            | -22.4492 | -43.00306 | 1801 | Couto 3072 (R)        | MN203463, MN203355, MN203269 |
|                       | <i>V. longicaulis</i>                           | -22.4575 | -43.02417 | 1801 | Couto 3071 (R)        | MN203467, MN203360, MN203274 |
|                       | <i>V. longistaminea</i>                         | -20.16   | -43.42389 | 879  | RBvb975               | MN203468, MN203361, MN203275 |
|                       | <i>V. minuta</i>                                | -16.3833 | -39.13333 | 189  | Moura 829 (R)         | MN203471, MN203363, -        |
|                       | <i>V. pabstii</i>                               | -22.8739 | -44.44861 | 494  | Kessous 229 (R)       | MN203475, MN203367, MN203279 |
|                       | <i>V. platynema</i> var. <i>variegata</i>       | -25.4769 | -48.8344  | 1280 | Kowalski 29 (HUPG)    | MN203496, MN203389, -        |

|                        |          |           |     |                         |                              |
|------------------------|----------|-----------|-----|-------------------------|------------------------------|
| <i>V. pseudatra</i>    | -22.9028 | -43.2075  | 500 | Moura 580 (R)           | MT874429, MT874394, -        |
| <i>V. sazimae</i>      | -22.3688 | -44.7492  | 407 | Moura 1163 (R)          | MN203486, MN203378, MN203285 |
| <i>V. sincorana</i>    | -11.55   | -41.1561  | 800 | Moura 864 (R)           | MN203491, MN203383, MN203290 |
| <i>V. unilateralis</i> | -23.1989 | -44.98944 | 919 | Kessous & Neves 230 (R) | MN203495, MN203388, MN203295 |

---

**Table S2.** Floral traits measured for the Correspondence Analysis: floral bract color (mostly 0 = yellow tones, 1 = red tones, 2 = green, 3 = purple/brown, 4 = stramineous), floral bract size related to flower length (0 = shorter than midpoint of the flower, 1 = equal to midpoint to longer than flower), floral bract imbrication (0 = not imbricate, 1 = imbricate), flower disposition along inflorescence rachis or branches (0 = polystichous, 1 = distichous), time of day of flower anthesis (0 = diurnal, 1 = nocturnal), position of flowers at anthesis in relation to floral bract (0 = included with less than 1/3 of the flower exposed, 1 = exerted with half of more exposed), torsion of the flowers (0 = not-secund, 1 = partially or totally secund), flower odor (0 = absent, 1 = present), corolla color (mostly 0 = yellow, 1 = white, 2 = pale-yellow, 3 = green, 4 = wine/purple), corolla shape (0 = tubular, 1 = campanulate), stamens position at anthesis (0 = included, 1 = exerted).

| Pollination syndrome          | Species                    | Floral bract color | Floral bract size related to flower length | Floral bract imbrication | Flower disposition along rachis | Time of flower anthesis | Position of flowers at anthesis in relation to floral bract | Torsion of the flowers | Flower odor | Corolla color | Corolla shape | Stamens position at anthesis |
|-------------------------------|----------------------------|--------------------|--------------------------------------------|--------------------------|---------------------------------|-------------------------|-------------------------------------------------------------|------------------------|-------------|---------------|---------------|------------------------------|
|                               | <i>Vriesea agostiniana</i> | 1                  | 1                                          | 0                        | 1                               | 0                       | 1                                                           | 0                      | 0           | 0             | 0             | 1                            |
|                               | <i>V. amethystina</i>      | 0                  | 0                                          | 0                        | 1                               | 0                       | 1                                                           | 0                      | 0           | 0             | 0             | 1                            |
|                               | <i>V. billbergioides</i>   | 1                  | 0                                          | 0                        | 1                               | 0                       | 1                                                           | 0                      | 0           | 0             | 0             | 1                            |
| <i>Vriesea</i> - hummingbirds | <i>V. botafogensis</i>     | 0                  | 0                                          | 0                        | 1                               | 0                       | 1                                                           | 0                      | 0           | 0             | 0             | 1                            |
|                               | <i>V. cacuminis</i>        | 1                  | 0                                          | 0                        | 1                               | 0                       | 1                                                           | 0                      | 0           | 0             | 0             | 0                            |
|                               | <i>V. calimaniana</i>      | 1                  | 1                                          | 1                        | 1                               | 0                       | 1                                                           | 0                      | 0           | 0             | 0             | 1                            |
|                               | <i>V. capixabae</i>        | 1                  | 1                                          | 0                        | 1                               | 0                       | 1                                                           | 0                      | 0           | 0             | 0             | 1                            |

| Pollination syndrome | Species                                        | Floral bract color | Floral bract size related to flower length | Floral bract imbrication | Flower disposition along rachis | Time of flower anthesis | Position of flowers at anthesis in relation to floral bract | Torsion of the flowers | Flower odor | Corolla color | Corolla shape | Stamens position at anthesis |
|----------------------|------------------------------------------------|--------------------|--------------------------------------------|--------------------------|---------------------------------|-------------------------|-------------------------------------------------------------|------------------------|-------------|---------------|---------------|------------------------------|
|                      | <i>V. carinata</i>                             | 0                  | 1                                          | 0                        | 1                               | 0                       | 1                                                           | 0                      | 0           | 0             | 0             | 1                            |
|                      | <i>V. carinata</i> var. <i>flavominiata</i>    | 0                  | 1                                          | 0                        | 1                               | 0                       | 1                                                           | 0                      | 0           | 0             | 0             | 1                            |
|                      | <i>V. carinata</i> var. <i>mangaratibensis</i> | 1                  | 1                                          | 0                        | 1                               | 0                       | 1                                                           | 0                      | 0           | 0             | 0             | 1                            |
|                      | <i>V. duvaliana</i>                            | 1                  | 1                                          | 1                        | 1                               | 0                       | 1                                                           | 0                      | 0           | 0             | 0             | 1                            |
|                      | <i>V. eltoniana</i>                            | 0                  | 1                                          | 1                        | 1                               | 0                       | 1                                                           | 0                      | 0           | 0             | 0             | 1                            |
|                      | <i>V. ensiformis</i> var. <i>ensiformis</i>    | 1                  | 1                                          | 0                        | 1                               | 0                       | 0                                                           | 0                      | 0           | 0             | 0             | 1                            |
|                      | <i>V. ensiformis</i> var. <i>ensiformis</i>    | 1                  | 1                                          | 0                        | 1                               | 0                       | 0                                                           | 0                      | 0           | 0             | 0             | 1                            |
|                      | <i>V. ensiformis</i> var. <i>ensiformis</i>    | 1                  | 1                                          | 0                        | 1                               | 0                       | 0                                                           | 0                      | 0           | 0             | 0             | 1                            |
|                      | <i>V. ensiformis</i> var. <i>ensiformis</i>    | 1                  | 1                                          | 0                        | 1                               | 0                       | 0                                                           | 0                      | 0           | 0             | 0             | 1                            |
|                      | <i>V. ensiformis</i> var. <i>striata</i>       | 1                  | 1                                          | 0                        | 1                               | 0                       | 0                                                           | 0                      | 0           | 0             | 0             | 1                            |
|                      | <i>V. erythrodactylon</i>                      | 0                  | 1                                          | 1                        | 1                               | 0                       | 0                                                           | 0                      | 0           | 0             | 0             | 1                            |
|                      | <i>V. flammea</i>                              | 1                  | 1                                          | 0                        | 2                               | 0                       | 1                                                           | 0                      | 0           | 1             | 0             | 1                            |
|                      | <i>V. flammea</i>                              | 1                  | 1                                          | 0                        | 2                               | 0                       | 1                                                           | 0                      | 0           | 1             | 0             | 1                            |



| Pollination syndrome | Species                      | Floral bract color | Floral bract size related to flower length | Floral bract imbrication | Flower disposition along rachis | Time of flower anthesis | Position of flowers at anthesis in relation to floral bract | Torsion of the flowers | Flower odor | Corolla color | Corolla shape | Stamens position at anthesis |
|----------------------|------------------------------|--------------------|--------------------------------------------|--------------------------|---------------------------------|-------------------------|-------------------------------------------------------------|------------------------|-------------|---------------|---------------|------------------------------|
|                      | <i>V. flava</i>              | 0                  | 1                                          | 1                        | 1                               | 0                       | 1                                                           | 0                      | 0           | 0             | 0             | 1                            |
|                      | <i>V. fluviatilis</i>        | 1                  | 1                                          | 1                        | 1                               | 0                       | 1                                                           | 0                      | 0           | 0             | 0             | 1                            |
|                      | <i>V. fluviatilis</i>        | 1                  | 1                                          | 1                        | 1                               | 0                       | 1                                                           | 0                      | 0           | 0             | 0             | 1                            |
|                      | <i>V. gracilior</i>          | 1                  | 1                                          | 0                        | 1                               | 0                       | 1                                                           | 0                      | 0           | 0             | 0             | 0                            |
|                      | <i>V. gradata</i>            | 1                  | 1                                          | 1                        | 1                               | 0                       | 1                                                           | 0                      | 0           | 0             | 0             | 1                            |
|                      | <i>V. gutatta</i>            | 1                  | 1                                          | 1                        | 1                               | 0                       | 1                                                           | 0                      | 0           | 0             | 0             | 1                            |
|                      | <i>V. heterostachys</i>      | 1                  | 1                                          | 0                        | 1                               | 0                       | 1                                                           | 0                      | 0           | 0             | 0             | 1                            |
|                      | <i>V. aff. heterostachys</i> | 1                  | 1                                          | 0                        | 1                               | 0                       | 1                                                           | 0                      | 0           | 0             | 0             | 1                            |
|                      | <i>V. inflata</i>            | 1                  | 1                                          | 1                        | 1                               | 0                       | 0                                                           | 0                      | 0           | 0             | 0             | 1                            |
|                      | <i>V. aff. inflata</i>       | 1                  | 1                                          | 1                        | 1                               | 0                       | 0                                                           | 0                      | 0           | 0             | 0             | 1                            |
|                      | <i>V. interrogatoria</i>     | 1                  | 1                                          | 0                        | 1                               | 0                       | 1                                                           | 0                      | 0           | 0             | 0             | 1                            |
|                      | <i>V. lubbersi</i>           | 1                  | 1                                          | 0                        | 1                               | 0                       | 1                                                           | 0                      | 0           | 0             | 0             | 1                            |
|                      | <i>V. maxoniana</i>          | 0                  | 1                                          | 0                        | 1                               | 0                       | 1                                                           | 0                      | 0           | 0             | 0             | 1                            |

| Pollination syndrome | Species                  | Floral bract color | Floral bract size related to flower length | Floral bract imbrication | Flower disposition along rachis | Time of flower anthesis | Position of flowers at anthesis in relation to floral bract | Torsion of the flowers | Flower odor | Corolla color | Corolla shape | Stamens position at anthesis |
|----------------------|--------------------------|--------------------|--------------------------------------------|--------------------------|---------------------------------|-------------------------|-------------------------------------------------------------|------------------------|-------------|---------------|---------------|------------------------------|
|                      | <i>V. modesta</i>        | 1                  | 1                                          | 0                        | 1                               | 0                       | 1                                                           | 0                      | 0           | 0             | 0             | 1                            |
|                      | <i>V. neoglutinosa</i>   | 1                  | 1                                          | 0                        | 1                               | 0                       | 1                                                           | 0                      | 0           | 0             | 0             | 1                            |
|                      | <i>V. paraibica</i>      | 1                  | 1                                          | 0                        | 1                               | 0                       | 1                                                           | 0                      | 0           | 0             | 0             | 1                            |
|                      | <i>V. aff. procera</i>   | 1                  | 1                                          | 0                        | 1                               | 0                       | 1                                                           | 0                      | 0           | 0             | 0             | 1                            |
|                      | <i>V. psittacina</i>     | 1                  | 1                                          | 0                        | 1                               | 0                       | 1                                                           | 0                      | 0           | 0             | 0             | 1                            |
|                      | <i>V. recurvata</i>      | 1                  | 1                                          | 0                        | 1                               | 0                       | 0                                                           | 0                      | 0           | 0             | 0             | 1                            |
|                      | <i>V. repandostachys</i> | 1                  | 1                                          | 1                        | 1                               | 0                       | 0                                                           | 0                      | 0           | 0             | 0             | 1                            |
|                      | <i>V. rhodostachys</i>   | 1                  | 1                                          | 1                        | 1                               | 0                       | 0                                                           | 0                      | 0           | 0             | 0             | 1                            |
|                      | <i>V. rhodostachys</i>   | 1                  | 1                                          | 1                        | 1                               | 0                       | 0                                                           | 0                      | 0           | 0             | 0             | 1                            |
|                      | <i>V. rodigasiana</i>    | 0                  | 0                                          | 0                        | 1                               | 0                       | 1                                                           | 0                      | 0           | 0             | 0             | 1                            |
|                      | <i>V. rubyae</i>         | 1                  | 1                                          | 1                        | 1                               | 0                       | 1                                                           | 0                      | 0           | 0             | 0             | 1                            |
|                      | <i>V. rubyae</i>         | 1                  | 1                                          | 1                        | 1                               | 0                       | 1                                                           | 0                      | 0           | 0             | 0             | 1                            |
|                      | <i>V. saundersii</i>     | 0                  | 1                                          | 0                        | 1                               | 0                       | 1                                                           | 1                      | 0           | 0             | 0             | 0                            |

| Pollination syndrome | Species                                         | Floral bract color | Floral bract size related to flower length | Floral bract imbrication | Flower disposition along rachis | Time of flower anthesis | Position of flowers at anthesis in relation to floral bract | Torsion of the flowers | Flower odor | Corolla color | Corolla shape | Stamens position at anthesis |
|----------------------|-------------------------------------------------|--------------------|--------------------------------------------|--------------------------|---------------------------------|-------------------------|-------------------------------------------------------------|------------------------|-------------|---------------|---------------|------------------------------|
|                      | <i>V. sandrae</i>                               | 1                  | 1                                          | 1                        | 1                               | 0                       | 1                                                           | 0                      | 0           | 0             | 0             | 1                            |
|                      | <i>V. scalaris</i> var. <i>scalaris</i>         | 1                  | 0                                          | 0                        | 1                               | 0                       | 1                                                           | 0                      | 0           | 0             | 0             | 1                            |
|                      | <i>V. scalaris</i> var. <i>scalaris</i>         | 1                  | 0                                          | 0                        | 1                               | 0                       | 1                                                           | 0                      | 0           | 0             | 0             | 1                            |
|                      | <i>V. scalaris</i> var. <i>viridis</i>          | 2                  | 0                                          | 0                        | 1                               | 0                       | 1                                                           | 0                      | 0           | 0             | 0             | 1                            |
|                      | <i>V. seideliana</i>                            | 1                  | 1                                          | 0                        | 1                               | 0                       | 1                                                           | 0                      | 0           | 0             | 0             | 1                            |
|                      | <i>V. simplex</i>                               | 1                  | 1                                          | 0                        | 1                               | 0                       | 1                                                           | 0                      | 0           | 0             | 0             | 1                            |
|                      | <i>V. simplex</i>                               | 1                  | 1                                          | 0                        | 1                               | 0                       | 1                                                           | 0                      | 0           | 0             | 0             | 1                            |
|                      | <i>V. sucrei</i>                                | 1                  | 1                                          | 0                        | 1                               | 0                       | 1                                                           | 0                      | 0           | 0             | 0             | 1                            |
|                      | <i>V. sucrei</i>                                | 1                  | 1                                          | 0                        | 1                               | 0                       | 1                                                           | 0                      | 0           | 0             | 0             | 1                            |
|                      | <i>V. taritubensis</i> var. <i>brevisepala</i>  | 1                  | 1                                          | 1                        | 1                               | 0                       | 1                                                           | 0                      | 0           | 0             | 0             | 1                            |
|                      | <i>V. taritubensis</i> var. <i>patens</i>       | 1                  | 1                                          | 1                        | 1                               | 0                       | 1                                                           | 0                      | 0           | 0             | 0             | 1                            |
|                      | <i>V. taritubensis</i> var. <i>taritubensis</i> | 1                  | 1                                          | 1                        | 1                               | 0                       | 1                                                           | 0                      | 0           | 0             | 0             | 1                            |
|                      | <i>V. teresopolitana</i>                        | 1                  | 1                                          | 1                        | 1                               | 0                       | 1                                                           | 0                      | 0           | 0             | 0             | 1                            |

| Pollination syndrome | Species                                   | Floral bract color | Floral bract size related to flower length | Floral bract imbrication | Flower disposition along rachis | Time of flower anthesis | Position of flowers at anthesis in relation to floral bract | Torsion of the flowers | Flower odor | Corolla color | Corolla shape | Stamens position at anthesis |
|----------------------|-------------------------------------------|--------------------|--------------------------------------------|--------------------------|---------------------------------|-------------------------|-------------------------------------------------------------|------------------------|-------------|---------------|---------------|------------------------------|
|                      | <i>V. vagans</i>                          | 4                  | 0                                          | 0                        | 1                               | 0                       | 1                                                           | 1                      | 0           | 0             | 0             | 1                            |
|                      | <i>V. atra</i>                            | 3                  | 1                                          | 0                        | 1                               | 1                       | 1                                                           | 0                      | 1           | 2             | 1             | 0                            |
|                      | <i>V. bituminosa</i>                      | 1-2                | 1                                          | 0                        | 1                               | 1                       | 1                                                           | 0                      | 1           | 4             | 1             | 0                            |
|                      | <i>V. fenestralis</i>                     | 2                  | 1                                          | 0                        | 1                               | 1                       | 1                                                           | 0                      | 1           | 2             | 1             | 0                            |
|                      | <i>V. fosteriana</i>                      | 3                  | 1                                          | 0                        | 1                               | 1                       | 1                                                           | 0                      | 1           | 2             | 1             | 0                            |
|                      | <i>V. gigantea</i>                        | 2                  | 0                                          | 0                        | 1                               | 1                       | 1                                                           | 1                      | 1           | 2             | 1             | 1                            |
| Vriesea- bats        | <i>V. grandiflora</i>                     | 3                  | 1                                          | 0                        | 1                               | 1                       | 1                                                           | 0                      | 1           | 2             | 1             | 1                            |
|                      | <i>V. hydrophora</i>                      | 2                  | 1                                          | 0                        | 1                               | 1                       | 1                                                           | 1                      | 1           | 2             | 1             | 0                            |
|                      | <i>V. longicaulis</i>                     | 3                  | 1                                          | 0                        | 1                               | 1                       | 1                                                           | 1                      | 1           | 2             | 1             | 1                            |
|                      | <i>V. longistaminea</i>                   | 2                  | 0                                          | 0                        | 1                               | 1                       | 1                                                           | 1                      | 1           | 2             | 1             | 1                            |
|                      | <i>V. minuta</i>                          | 2                  | 1                                          | 0                        | 1                               | 1                       | 1                                                           | 0                      | 1           | 2             | 1             | 0                            |
|                      | <i>V. pabstii</i>                         | 2                  | 1                                          | 0                        | 1                               | 1                       | 1                                                           | 1                      | 1           | 2             | 1             | 0                            |
|                      | <i>V. platynema</i> var. <i>variegata</i> | 3                  | 1                                          | 0                        | 1                               | 1                       | 1                                                           | 0                      | 1           | 2             | 1             | 0                            |

| <b>Pollination syndrome</b> | <b>Species</b>         | <b>Floral bract color</b> | <b>Floral bract size related to flower length</b> | <b>Floral bract imbrication</b> | <b>Flower disposition along rachis</b> | <b>Time of flower anthesis</b> | <b>Position of flowers at anthesis in relation to floral bract</b> | <b>Torsion of the flowers</b> | <b>Flower odor</b> | <b>Corolla color</b> | <b>Corolla shape</b> | <b>Stamens position at anthesis</b> |
|-----------------------------|------------------------|---------------------------|---------------------------------------------------|---------------------------------|----------------------------------------|--------------------------------|--------------------------------------------------------------------|-------------------------------|--------------------|----------------------|----------------------|-------------------------------------|
|                             | <i>V. pseudatra</i>    | 3                         | 1                                                 | 0                               | 1                                      | 1                              | 1                                                                  | 0                             | 1                  | 2                    | 1                    | 0                                   |
|                             | <i>V. sazimae</i>      | 2                         | 1                                                 | 0                               | 1                                      | 1                              | 1                                                                  | 1                             | 1                  | 2                    | 1                    | 0                                   |
|                             | <i>V. sincorana</i>    | 3                         | 1                                                 | 0                               | 1                                      | 1                              | 1                                                                  | 0                             | 1                  | 2                    | 1                    | 1                                   |
|                             | <i>V. unilateralis</i> | 2                         | 1                                                 | 0                               | 1                                      | 1                              | 1                                                                  | 0                             | 1                  | 2                    | 1                    | 0                                   |

See also .csv file.

**Table S3.** Known pollinators and floral visitors of *Vriesea* species in Brazil and the domains in which species occur (AF: Atlantic Forest and CE: Cerrado). Species sampled in this study are marked in bold. As a first assessment, we here report all studies we found mentioning pollinators or visitors of *Vriesea* species, regardless the methodology applied. Symbols: \*indicates visitors, §*V. morreniana* is an artificial hybrid and does not exist in nature, based on the locality information the species is probably *V. interrogatoria* L. B. Sm. (Costa, 1997).

| <b><i>Vriesea</i> species</b> | <b>Brazilian domain</b> | <b>Pollinator / Visitor</b>          | <b>Pollinator / Visitor species</b>                                                                                                                                                                                                                                                                                                                     | <b>Reference</b>                                                                       | <b>Details of referenced studies</b>                                                                                                                                                                                                                                                                                                                                                                                                                                                                                                    |
|-------------------------------|-------------------------|--------------------------------------|---------------------------------------------------------------------------------------------------------------------------------------------------------------------------------------------------------------------------------------------------------------------------------------------------------------------------------------------------------|----------------------------------------------------------------------------------------|-----------------------------------------------------------------------------------------------------------------------------------------------------------------------------------------------------------------------------------------------------------------------------------------------------------------------------------------------------------------------------------------------------------------------------------------------------------------------------------------------------------------------------------------|
| <i>V. altodaserrae</i>        | AF                      | Hummingbirds                         | <i>Amazilia versicolor</i> , <i>Anthracothorax nigricollis</i> , <i>Clytolaema rubricauda</i> , <i>Florisuga fusca</i> , <i>Leucochloris albicollis</i> , <i>Lophornis magnificus</i> , <i>Phaethornis eurynome</i> , <i>Thalurania glaucopis</i> , <i>Melanotrochilus fuscus</i> , <i>Chlorostilbon aureoventris</i> (= <i>Chlorostilbon lucidus</i> ) | Kaehler <i>et al.</i> (2005), Machado and Semir (2006), Nunes <i>et al.</i> (2018)     | <i>A. versicolor</i> , <i>A. nigricollis</i> , <i>C. rubricauda</i> , <i>L. albicollis</i> , <i>L. magnificus</i> , <i>P. eurynome</i> , <i>T. glaucopis</i> pollinated flowers touching their reproductive parts (Kaehler <i>et al.</i> 2005). <i>A. versicolor</i> , <i>A. nigricollis</i> , <i>C. rubricauda</i> , <i>L. albicollis</i> , <i>P. eurynome</i> , <i>T. glaucopis</i> , <i>M. fuscus</i> , <i>C. aureoventris</i> (= <i>C. lucidus</i> ) pollinated flowers touching their reproductive parts (Machado and Semir 2006). |
| <i>V. altomacaensis</i>       | AF                      | Hummingbirds                         | <i>Stephanoxis lalandi</i> , <i>Clytolaema rubricauda</i> , <i>Leucochloris albicollis</i>                                                                                                                                                                                                                                                              | Martinelli (1994)                                                                      | Visited by hummingbirds, <i>S. lalandi</i> likely the most effective vector in the study area due to its frequency and the fact of always touching the flowers stigma during the visits (Martinelli 1994).                                                                                                                                                                                                                                                                                                                              |
| <b><i>V. atra</i></b>         | AF                      | Bats                                 | <i>Anoura caudifer</i>                                                                                                                                                                                                                                                                                                                                  | Fischer (1994), Martinelli (1994)                                                      | <i>A. caudifer</i> visited the flowers and presented pollen grains on the snout and forehead (Martinelli 1994). Glossophaginae bat visited flowers touching their reproductive parts, the pollen was deposited on its head (Fischer 1994).                                                                                                                                                                                                                                                                                              |
| <b><i>V. bituminosa</i></b>   | AF                      | Bats, hummingbirds*, bees*, Diptera* | <i>Anoura caudifer</i> , <i>Ramphodon naevius</i> , <i>Trigona spinipes</i>                                                                                                                                                                                                                                                                             | Sazima <i>et al.</i> (1995), Wendt <i>et al.</i> (2008), R.L.M. (personal observation) | The bat <i>A. caudifer</i> touches the reproductive organs of the flowers to feed on the nectar (Sazima 1995).                                                                                                                                                                                                                                                                                                                                                                                                                          |

|                           |    |                        |                                                                                                                                                                                |                                                                                                                |                                                                                                                                                                                                                                                                                                                                                                                                                                                                                                                                                                                                                         |
|---------------------------|----|------------------------|--------------------------------------------------------------------------------------------------------------------------------------------------------------------------------|----------------------------------------------------------------------------------------------------------------|-------------------------------------------------------------------------------------------------------------------------------------------------------------------------------------------------------------------------------------------------------------------------------------------------------------------------------------------------------------------------------------------------------------------------------------------------------------------------------------------------------------------------------------------------------------------------------------------------------------------------|
| <i>V. cacuminis</i>       | AF | Hummingbirds,<br>bees* |                                                                                                                                                                                | R. Sadala, Museu Nacional,<br>Universidade Federal do Rio<br>de Janeiro, unpublished data.                     | Visited by hummingbirds and <i>Apis<br/>melifera</i> was registered collecting pollen<br>without pollinate flowers.                                                                                                                                                                                                                                                                                                                                                                                                                                                                                                     |
| <i>V. carinata</i>        | AF | Hummingbirds,<br>bees* | <i>Phaethornis eurynome, Ramphodon<br/>naevius</i>                                                                                                                             | Araujo <i>et al.</i> (1994), Machado<br>and Semir (2006), Vizentin-<br>Bugoni <i>et al.</i> (2014)             | <i>R. naevius</i> visited and pollinated flowers<br>touching the stigma and stamens of<br>flowers. Halictidae bees visited the flowers<br>but they rarely touch the stigmas, they<br>touch the petals and usually go directly to<br>the anthers to collect pollen (Araujo <i>et al.</i><br>1994). <i>P. eurynome</i> pollinated flowers<br>touching their reproductive parts<br>(Machado and Semir 2006). <i>P. eurynome</i><br>touched flower reproductive organs<br>(Vizentin-Bugoni <i>et al.</i> 2014).                                                                                                             |
| <i>V. delicatula</i>      | AF | Hummingbirds*          | <i>Ramphodon naevius, Thalurania<br/>glaucopis, Phaethornis eurynome</i>                                                                                                       | Wendt <i>et al.</i> (2008)                                                                                     | Hummingbirds were recorded visiting the<br>flowers.                                                                                                                                                                                                                                                                                                                                                                                                                                                                                                                                                                     |
| <i>V. ensiformis</i>      | AF | Hummingbirds,<br>bees* | <i>Ramphodon naevius, Phaethornis<br/>eurynome, Phaethornis squalidus,<br/>Leucochloris albicollis,<br/>Melanotrochilus fuscus (= Florisuga<br/>fusca), Amazilia fimbriata</i> | Araujo <i>et al.</i> (1994),<br>Martinelli (1994), Buzato <i>et<br/>al.</i> (2000), Wendt <i>et al.</i> (2008) | <i>L. albicollis</i> certainly touched the stigma<br>during visits (Martinelli 1994). <i>R. naevius</i><br>visited and pollinated flowers touching the<br>stigma and stamens of flowers. Halictidae<br>bees visited the flowers but they rarely<br>touch the stigmas, they touch the petals<br>and usually go direct to the anthers to<br>collect pollen (Araujo <i>et al.</i> 1994). <i>R.<br/>naevius</i> and <i>P. eurynome</i> touched the<br>sexual parts of flowers (Buzato <i>et al.</i><br>2000). <i>R. naevius</i> and <i>P. eurynome</i> were<br>recorded visiting the flowers (Wendt <i>et al.</i><br>2008). |
| <i>V. erythroductylon</i> | AF | Hummingbirds           | <i>Phaethornis eurynome</i>                                                                                                                                                    | Vizentin-Bugoni <i>et al.</i> (2014)                                                                           | <i>P. eurynome</i> touched flower reproductive<br>organs.                                                                                                                                                                                                                                                                                                                                                                                                                                                                                                                                                               |
| <i>V. fenestralis</i>     | AF | Hummingbirds*          | <i>Ramphodon naevius</i>                                                                                                                                                       | Wendt <i>et al.</i> (2008)                                                                                     | The hummingbird was recorded visiting<br>the flowers.                                                                                                                                                                                                                                                                                                                                                                                                                                                                                                                                                                   |

|                         |    |                                    |                                                                                                                                                                                      |                                                                                          |                                                                                                                                                                                                                                                                                                                                                                                                                                                                                                                                  |
|-------------------------|----|------------------------------------|--------------------------------------------------------------------------------------------------------------------------------------------------------------------------------------|------------------------------------------------------------------------------------------|----------------------------------------------------------------------------------------------------------------------------------------------------------------------------------------------------------------------------------------------------------------------------------------------------------------------------------------------------------------------------------------------------------------------------------------------------------------------------------------------------------------------------------|
| <i>V. flammea</i>       | AF | Hummingbirds                       | <i>Phaethornis eurynome</i> , <i>Leucochloris albicollis</i> , <i>Melanotrochilus fuscus</i> (= <i>Florisuga fusca</i> ), <i>Thalurania glaucopis</i> , <i>Clytolaema rubricauda</i> | Fischer (1994), Martinelli (1994), Buzato <i>et al.</i> (2000), Machado and Semir (2006) | <i>M. fuscus</i> (= <i>F. fusca</i> ) and <i>T. glaucopis</i> visited flowers, touching their reproductive parts, the pollen was deposited on their heads (Fischer 1994). <i>R. naevius</i> and <i>M. fuscus</i> (= <i>F. fusca</i> ) touched the sexual parts of flowers (Buzato <i>et al.</i> 2000). <i>L. albicollis</i> and <i>P. eurynome</i> pollinated flowers touching their reproductive parts (Machado and Semir 2006).                                                                                                |
| <i>V. friburgensis</i>  | AF | Hummingbirds, bees, other insects* | <i>Amazilia fimbriata</i> , <i>Thalurania glaucopis</i> , <i>Eupetomena macroura</i> , <i>Anthracothonax nigricollis</i> , <i>Xylocopa brasiliatorum</i> , <i>Colibri coruscans</i>  | Bernardello <i>et al.</i> (1991), Souza (2004), Schmid <i>et al.</i> (2011)              | <i>C. coruscans</i> was seen feeding on flowers (Bernardello <i>et al.</i> 1991). <i>A. fimbriata</i> and <i>A. nigricollis</i> are main pollinators at the locality and <i>X. brasiliatorum</i> is considered a secondary pollinator (Souza 2004). Hummingbirds and bees were more frequent visitors. Hummingbirds touched the anthers and stigma, the most frequent was <i>A. fimbriata</i> . Occasionally the bees touched the stigmas while collecting pollen. Many insects visited the flowers (Schmid <i>et al.</i> 2011). |
| <i>V. gigantea</i>      | AF | Bats                               | <i>Anoura caudifer</i>                                                                                                                                                               | Sazima <i>et al.</i> (1995)                                                              | The bat touches the reproductive organs of the flowers to feed on the nectar.                                                                                                                                                                                                                                                                                                                                                                                                                                                    |
| <i>V. gracilior</i>     | AF | Hummingbirds, butterflies, bees    | <i>Ramphodon naevius</i> , <i>Thalurania glaucopis</i> , <i>Phaethornis eurynome</i> , <i>Phaethornis squalidus</i> , <i>Heliconius nattereri</i> , <i>Trigona fulviventris</i>      | Varassin and Sazima (2012), Wendt <i>et al.</i> (2008)                                   | <i>P. eurynome</i> , <i>P. squalidus</i> , <i>R. naevius</i> , <i>H. nattereri</i> and <i>T. fulviventris</i> pollinators carried pollen and contacted stigmas (Varassin and Sazima 2012). <i>R. naevius</i> , <i>T. glaucopis</i> and <i>P. eurynome</i> were recorded visiting the flowers (Wendt <i>et al.</i> 2008).                                                                                                                                                                                                         |
| <i>V. guttata</i>       | AF | Hummingbirds                       | <i>Phaethornis eurynome</i>                                                                                                                                                          | Kaehler <i>et al.</i> (2005)                                                             | <i>P. eurynome</i> pollinated flowers touching their reproductive parts.                                                                                                                                                                                                                                                                                                                                                                                                                                                         |
| <i>V. heterostachys</i> | AF | Hummingbirds                       | <i>Phaethornis eurynome</i> , <i>Leucochloris albicollis</i>                                                                                                                         | Martinelli (1994), Kaehler <i>et al.</i> (2005)                                          | <i>P. eurynome</i> pollinated flowers touching their reproductive parts (Kaehler <i>et al.</i> 2005).                                                                                                                                                                                                                                                                                                                                                                                                                            |



|                        |    |                       |                                                                                                                    |                                                                                                                                                                         |                                                                                                                                                                                                                                                                                                                                                                                                                                                                                                                                                                                                                                                                                                                                                                           |
|------------------------|----|-----------------------|--------------------------------------------------------------------------------------------------------------------|-------------------------------------------------------------------------------------------------------------------------------------------------------------------------|---------------------------------------------------------------------------------------------------------------------------------------------------------------------------------------------------------------------------------------------------------------------------------------------------------------------------------------------------------------------------------------------------------------------------------------------------------------------------------------------------------------------------------------------------------------------------------------------------------------------------------------------------------------------------------------------------------------------------------------------------------------------------|
| <i>V. hoehneana</i>    | AF | Bats, bees*           | <i>Anoura caudifer</i> , <i>Pygoderma bilabiatum</i> , <i>Plebeia saiqui</i>                                       | Kaehler <i>et al.</i> (2005)                                                                                                                                            | <i>A. caudifer</i> and <i>P. bilabiatum</i> pollinated flowers touching their reproductive parts. <i>P. saiqui</i> did not pollinate flowers but collected pollen (Kaehler <i>et al.</i> 2005).                                                                                                                                                                                                                                                                                                                                                                                                                                                                                                                                                                           |
| <i>V. incurvata</i>    | AF | Hummingbirds, bees*   | <i>Amazilia fimbriata</i> , <i>Phaethornis eurynome</i> , <i>Melanotrochilus fuscus</i> , <i>Ramphodon naevius</i> | Araujo <i>et al.</i> (1994), Martinelli (1994), Buzato <i>et al.</i> (2000), Machado and Semir (2006), Silva and Piratelli (2014), Vizentin-Bugoni <i>et al.</i> (2014) | <i>A. fimbriata</i> received loaded pollen in the forehead and touched the stigma of flowers (Martinelli 1994). <i>R. naevius</i> visited and pollinated flowers touching the stigma and stamens of flowers. Halictidae bees visited the flowers but they rarely touch the stigmas, they touch the petals and usually go direct to the anthers to collect pollen (Araujo <i>et al.</i> 1994). <i>R. naevius</i> touched the sexual parts of flowers (Buzato <i>et al.</i> 2000). <i>P. eurynome</i> and <i>M. fuscus</i> pollinated flowers touching their reproductive parts (Machado and Semir 2006). <i>P. eurynome</i> pollinated the flowers (Silva and Piratelli 2014). <i>P. eurynome</i> touched flower reproductive organs (Vizentin-Bugoni <i>et al.</i> 2014). |
| <i>V. longicaulis</i>  | AF | Bats, hummingbirds*   | <i>Anoura caudifer</i> , <i>Ramphodon naevius</i>                                                                  | Sazima <i>et al.</i> (1995), Wendt <i>et al.</i> (2008)                                                                                                                 | The bat touches the reproductive organs of the flowers to feed on the nectar (Sazima <i>et al.</i> 1995). <i>R. naevius</i> was recorded visiting the flowers (Wendt <i>et al.</i> 2008).                                                                                                                                                                                                                                                                                                                                                                                                                                                                                                                                                                                 |
| <i>V. longiscapa</i>   | AF | Bats                  | <i>Anoura caudifer</i>                                                                                             | Sazima <i>et al.</i> (1995)                                                                                                                                             | The bat touched the reproductive organs of the flowers to feed on the nectar.                                                                                                                                                                                                                                                                                                                                                                                                                                                                                                                                                                                                                                                                                             |
| <i>V. minarum</i>      | CE | Hummingbirds*, wasps* |                                                                                                                    | Versieux (2011)                                                                                                                                                         | Hummingbirds and wasps were seen visiting the flowers.                                                                                                                                                                                                                                                                                                                                                                                                                                                                                                                                                                                                                                                                                                                    |
| <i>V. morreniana</i> § | AF | Hummingbirds          | <i>Phaethornis eurynome</i>                                                                                        | Buzato <i>et al.</i> (2000)                                                                                                                                             | <i>P. eurynome</i> touched the sexual parts of flowers.                                                                                                                                                                                                                                                                                                                                                                                                                                                                                                                                                                                                                                                                                                                   |

|                                                  |    |                                  |                                                                                                                                                                                                                                                                                            |                                                                                    |                                                                                                                                                                                                                                                                                                                                                                                                                                                                                                                                                                                        |
|--------------------------------------------------|----|----------------------------------|--------------------------------------------------------------------------------------------------------------------------------------------------------------------------------------------------------------------------------------------------------------------------------------------|------------------------------------------------------------------------------------|----------------------------------------------------------------------------------------------------------------------------------------------------------------------------------------------------------------------------------------------------------------------------------------------------------------------------------------------------------------------------------------------------------------------------------------------------------------------------------------------------------------------------------------------------------------------------------------|
| <b><i>V. neoglutinosa</i></b>                    | AF | Hummingbirds, bees, ants         | <i>Amazilia fimbriata</i> , <i>Chlorostilbon aureoventris</i> (= <i>Chlorostilbon lucidus</i> ), <i>Florisuga fusca</i> , <i>Thalurania glaucopis</i> , <i>Eupetomena macroura</i> , <i>Apis mellifera</i> , <i>Trigona spinipes</i> , <i>Lestrimelitta</i> sp., <i>Camponotus rufipes</i> | Martinelli (1994), Rodrigues (2008), Magalhães <i>et al.</i> (2018)                | <i>A. fimbriata</i> seems the most effective pollinator at the study site due to the frequency and behaviour when visiting the flowers, it visited all open flowers in each individual and touched the stigma at each visit (Martinelli 1994). <i>A. fimbriata</i> , <i>F. fusca</i> and <i>T. glaucopis</i> visited the flowers, <i>T. glaucopis</i> was the most frequent pollinator (Rodrigues 2008). The hummingbird <i>A. fimbriata</i> , the ant <i>C. rufipes</i> and the bee <i>A. mellifera</i> are most frequent pollinators at the locality (Magalhães <i>et al.</i> 2018). |
| <b><i>V. paraibica</i></b>                       | AF | Hummingbirds                     |                                                                                                                                                                                                                                                                                            | Martinelli (1994)                                                                  | An unidentified hummingbird contacted the stigma of flowers during the visits. No other visitors were observed at the locality (Martinelli 1994).                                                                                                                                                                                                                                                                                                                                                                                                                                      |
| <i>V. philippocoburgii</i>                       | AF | Hummingbirds                     | <i>Thalurania glaucopis</i> , <i>Phaethornis eurynome</i> , <i>Ramphodon naevius</i>                                                                                                                                                                                                       | Araujo <i>et al.</i> (1994), Buzato <i>et al.</i> (2000), Machado and Semir (2006) | <i>P. eurynome</i> was recorded visiting the flowers (Araujo <i>et al.</i> 1994). <i>R. naevius</i> touched the sexual parts of flowers (Buzato <i>et al.</i> 2000). <i>T. glaucopis</i> pollinated flowers touching their reproductive parts (Machado and Semir 2006).                                                                                                                                                                                                                                                                                                                |
| <i>V. platynema</i> var. <i>platynema</i>        | AF | Bees*                            |                                                                                                                                                                                                                                                                                            | R. L. M. (personal observation)                                                    | The bees were registered visiting the flowers.                                                                                                                                                                                                                                                                                                                                                                                                                                                                                                                                         |
| <b><i>V. platynema</i> var. <i>variegata</i></b> | AF | Bats, hummingbirds*, orthoptera* | <i>Anoura caudifer</i> , <i>Anoura geoffroyi</i> , <i>Pygoderma bilabiatum</i> , <i>Phaethornis eurynome</i> , <i>Thalurania glaucopis</i> , <i>Leucochloris albicollis</i>                                                                                                                | Kaehler <i>et al.</i> (2005)                                                       | The bats pollinated flowers touching their reproductive parts. The hummingbirds collected nectar during the morning when flowers were withering and the orthoptera collected pollen, they were not classified as pollinators by the authors (Kaehler <i>et al.</i> 2005).                                                                                                                                                                                                                                                                                                              |

|                       |    |                     |                                                                                                                                                                                     |                                                                                   |                                                                                                                                                                                                                                                                                                                                                                                                                                                                                                        |
|-----------------------|----|---------------------|-------------------------------------------------------------------------------------------------------------------------------------------------------------------------------------|-----------------------------------------------------------------------------------|--------------------------------------------------------------------------------------------------------------------------------------------------------------------------------------------------------------------------------------------------------------------------------------------------------------------------------------------------------------------------------------------------------------------------------------------------------------------------------------------------------|
| <i>V. poenulata</i>   | AF | Hummingbirds*       | <i>Ramphodon naevius</i> , <i>Phaethornis eurynome</i>                                                                                                                              | Wendt <i>et al.</i> (2008)                                                        | The hummingbirds were recorded visiting the flowers.                                                                                                                                                                                                                                                                                                                                                                                                                                                   |
| <i>V. procera</i>     | AF | Hummingbirds        | <i>Amazilia fimbriata</i>                                                                                                                                                           | Buzato <i>et al.</i> (2000)                                                       | <i>A. fimbriata</i> touched the sexual parts of flowers.                                                                                                                                                                                                                                                                                                                                                                                                                                               |
| <i>V. psittacina</i>  | AF | Hummingbirds        | <i>Melanotrochilus fuscus</i> , <i>Phaethornis pretrei</i> , <i>Leucochloris albicollis</i> , <i>Phaethornis eurynome</i> , <i>Phaethornis squalidus</i> , <i>Ramphodon naevius</i> | Martinelli (1994), Siqueira-Filho and Machado (2004), Varassin and Sazima (2012). | Both hummingbirds visited flowers touching the stigma and anthers while collecting nectar, in frequent visits (Martinelli 1994). Observations of these hummingbirds were rare at the locality, additionally, <i>Glaucis hirsuta</i> and <i>Phaethornis ruber</i> were registered at the locality (Siqueira-Filho and Machado 2004). <i>L. albicollis</i> , <i>P. eurynome</i> , <i>P. squalidus</i> and <i>R. naevius</i> pollinators carried pollen and contacted stigmas (Varassin and Sazima 2012). |
| <i>V. reitzii</i>     | AF | Hummingbirds        | <i>Leucochloris albicollis</i>                                                                                                                                                      | Favretto <i>et al.</i> (2010)                                                     | Flower visited by <i>L. albicollis</i> .                                                                                                                                                                                                                                                                                                                                                                                                                                                               |
| <i>V. rodigasiana</i> | AF | Hummingbirds        | <i>Thalurania glaucopis</i> , <i>Ramphodon naevius</i> , <i>Phaethornis eurynome</i>                                                                                                | Buzato <i>et al.</i> (2000), Rocca and Sazima (2013)                              | <i>T. glaucopis</i> touched the sexual parts of flowers (Buzato <i>et al.</i> 2000). <i>T. glaucopis</i> and <i>R. naevius</i> pollinated flowers (Rocca and Sazima 2013).                                                                                                                                                                                                                                                                                                                             |
| <i>V. ruschii</i>     | AF | Bats*               |                                                                                                                                                                                     | Wendt <i>et al.</i> (2008)                                                        | The bat was recorded visiting the flowers .                                                                                                                                                                                                                                                                                                                                                                                                                                                            |
| <i>V. sazimae</i>     | AF | Bats, hummingbirds* | <i>Anoura caudifer</i> , <i>Anoura geoffroyi</i> , <i>Stephanoxis lalandi</i>                                                                                                       | Sazima <i>et al.</i> (1995)                                                       | The bats touch the reproductive organs of the flowers to feed on the nectar. The hummingbird visited the withered flowers during the morning to feed on the remaining nectar.                                                                                                                                                                                                                                                                                                                          |
| <i>V. scalaris</i>    | AF | Hummingbirds        | <i>Ramphodon naevius</i> , <i>Thalurania glaucopis</i> , <i>Phaethornis eurynome</i>                                                                                                | Buzato <i>et al.</i> (2000), Wendt <i>et al.</i> (2008)                           | <i>R. naevius</i> touched the sexual parts of flowers (Buzato <i>et al.</i> 2000). <i>R. naevius</i> , <i>T. glaucopis</i> and <i>P. eurynome</i> were recorded visiting the flowers (Wendt <i>et al.</i> 2008).                                                                                                                                                                                                                                                                                       |

|                                                |    |                     |                                                                                                               |                                                                                              |                                                                                                                                                                                                                                                                                                                  |
|------------------------------------------------|----|---------------------|---------------------------------------------------------------------------------------------------------------|----------------------------------------------------------------------------------------------|------------------------------------------------------------------------------------------------------------------------------------------------------------------------------------------------------------------------------------------------------------------------------------------------------------------|
| <i>V. sceptrum</i>                             | AF | Hummingbirds        | <i>Phaethornis eurynome, Leucochloris albicollis</i>                                                          | Buzato <i>et al.</i> (2000)                                                                  | <i>P. eurynome</i> and <i>L. albicollis</i> touched the sexual parts of flowers.                                                                                                                                                                                                                                 |
| <i>V. simplex</i>                              | AF | Hummingbirds        | <i>Ramphodon naevius, Thalurania glaucopis, Phaethornis eurynome, Trigona spinipes</i>                        | Varassin and Sazima (2012), Wendt <i>et al.</i> (2008), Vizentin-Bugoni <i>et al.</i> (2014) | <i>P. eurynome</i> pollinator carried pollen and contacted stigmas (Varassin and Sazima 2012). <i>R. naevius, T. glaucopis</i> and <i>P. eurynome</i> were recorded visiting the flowers (Wendt <i>et al.</i> 2008). <i>P. eurynome</i> touched flower reproductive organs (Vizentin-Bugoni <i>et al.</i> 2014). |
| <i>V. sparsiflora</i>                          | AF | Hummingbirds        | <i>Clytolaema rubricauda, Leucochloris albicollis, Stephanoxis lalandi, Phaethornis eurynome</i>              | Martinelli (1994)                                                                            | The most effective hummingbird pollinator at the locality is <i>P. eurynome</i> based on frequency of visits and behaviour. All hummingbird species were registered touching the stigma of flowers and no other visitor was recorded (Martinelli 1994).                                                          |
| <i>V. haematina</i> (= <i>V. triligulata</i> ) | AF | Hummingbirds        | <i>Stephanoxis lalandi, Clytolaema rubricauda, Leucochloris albicollis</i>                                    | Martinelli (1994)                                                                            | <i>S. lalandi</i> and <i>L. albicollis</i> touched the stigma and anthers of flowers during the visits and were the most frequent visitors (Martinelli 1994).                                                                                                                                                    |
| <i>V. vagans</i>                               | AF | Hummingbirds, bees* | <i>Ramphodon naevius, Thalurania glaucopis, Phaethornis eurynome, Phaethornis squalidus, Trigona spinipes</i> | Fischer (1994), Martinelli (1994), Wendt <i>et al.</i> (2008)                                | <i>T. glaucopis</i> visited flowers, touching their reproductive parts, the pollen was deposited on its throat (Fischer 1994). <i>R. naevius, T. glaucopis, P. eurynome, P. squalidus</i> and <i>T. spinipes</i> were recorded visiting the flowers (Wendt <i>et al.</i> 2008).                                  |

## Literature Cited

- Araujo AC, Fischer EA, Sazima M. 1994. Floração sequencial e polinização de três espécies de *Vriesea* (Bromeliaceae) na região de Juréia, sudeste do Brasil. *Revista Brasileira de Botânica* 17: 113–118.
- Bernardello M, Galetto L, Juliani HR. 1991. Floral nectar, nectary structure and pollinators in some Argentinean Bromeliaceae. *Annals of Botany* 67: 401–411.
- Buzato S, Sazima M, Sazima I. 2000. Hummingbird-pollinated floras at three Atlantic Forest sites. *Biotropica* 32: 824–841.
- Costa AF. 1997. Nota sobre o Herbário e o Jardim Botânico da Universidade de Liège, Bélgica: a importância das coleções e o exemplo de *Vriesea morreniana*. *Bromélia* 4: 9–13.
- Favretto MA, Hoeltgebaum MP, Lingnauer R, D'Agostini FM. 2010. Beija-flores visitantes de bromélias no Parque Natural Municipal Rio do Peixe, Joaçaba, Santa Catarina, Brasil. *Atualidades Ornitológicas* 158: 11–13.
- Fischer EE. 1994. *Polinização, fenologia e distribuição espacial de Bromeliaceae numa comunidade de Mata Atlântica, litoral Sul de São Paulo*. Master dissertation, Universidade Estadual de Campinas, Brazil.
- Kaehler M, Varassin IG, Goldenberg R. 2005. Polinização em uma comunidade de bromélias em Floresta Atlântica Alto-montana no Estado do Paraná, Brasil. *Revista Brasileira de Botânica* 28: 219–228.
- Machado CG, Semir J. 2006. Fenologia da floração e biologia floral de bromeliáceas ornitófilas de uma área da Mata Atlântica do Sudeste brasileiro. *Revista Brasileira de Botânica* 29: 163–174.
- Magalhães AFP, Maruyama PK, Tavares LAF, Martins RL. 2018. The relative importance of hummingbirds as pollinators in two bromeliads with contrasting floral specializations and breeding systems. *Botanical Journal of the Linnean Society* 188: 316–326.
- Martinelli G. 1994. *Reproductive biology of Bromeliaceae in the Atlantic rainforest of southeastern Brazil*. PhD thesis, University of St Andrews, Scotland, UK.
- Nunes CE, Briet J, Galetto L, Sazima M, Amorim FW. 2018. Nectar ecology of the endemic epiphytic hummingbird-pollinated bromeliad *Vriesea altodaserrae*: secretion dynamics and pollinator visitation pattern. *Acta Botanica Brasilica* 32: 479–486.

- Rocca MA, Sazima M. 2013. Quantity versus quality: identifying the most effective pollinators of the hummingbird-pollinated *Vriesea rodigasiana* (Bromeliaceae). *Plant Systematics and Evolution* 299: 97–105.
- Rodrigues MS. 2008. *Partilha de recursos florais por beija-flores em uma área de Mata Atlântica na Ilha de Marambaia, RJ*. Master dissertation, Universidade Federal Rural do Rio de Janeiro, Brazil.
- Sazima M, Buzato S, Sazima I. 1995. Bat pollination of *Vriesea* in southeastern Brazil. *Bromélia* 2: 29–37.
- Schmid S, Schmid VS, Zillikens A, Steiner J. 2011. Diversity of flower visitors and their role for pollination in the ornithophilous bromeliad *Vriesea friburgensis* in two different habitats in southern Brazil. *Ecotropica* 17: 91–102.
- Silva BG, Piratelli AJ. 2014. Foraging behaviour of the scale-throated hermit *Phaethornis eurynome* Lesson, 1832 (Aves, Trochilidae) in *Vriesea incurvata* Gaudich (Bromeliaceae). *Brazilian Journal of Biology* 74: 311–314.
- Siqueira-Filho JA, Machado IC. 2004. Síndromes de polinização de uma comunidade de Bromeliaceae e biologia floral de *Vriesea psittacina* (Hooker) Lindley (Bromeliaceae) em Brejo dos Cavalos, Caruaru, Pernambuco. In: Porto KC, Cabral JJP, Tabarelli M orgs. *Brejos de Altitude em Pernambuco e Paraíba- História Natural, Ecologia e Conservação*. Brasília, Ministério do Meio Ambiente, 227–284.
- Souza DAS. 2004. *Ecologia reprodutiva de Vriesea friburgensis Mez var. paludosa (L. B. Smith) L. B. Smith (Bromeliaceae), em área de restinga, no litoral sul de Santa Catarina, Brasil*. Master dissertation, Universidade Federal de Santa Catarina, Brazil.
- Varassin IG, Sazima M. 2012. Spatial heterogeneity and the distribution of bromeliad pollinators in the Atlantic Forest. *Acta Oecologica* 43, 104–112.
- Versieux LM. 2011. Brazilian plants urgently needing conservation: the case of *Vriesea minarum* (Bromeliaceae). *Phytotaxa* 28: 35–49.
- Vizentin-Bugoni J, Maruyama PK, Sazima M. 2014. Processes entangling interactions in communities: forbidden links are more important than abundance in a hummingbird–plant network. *Proceedings of the Royal Society B: Biological Sciences* 281: e20132397.
- Wendt T, Coser TS, Matallana G, Guilherme FAG. 2008. An apparent lack of prezygotic reproductive isolation among 42 sympatric species of Bromeliaceae in southeastern Brazil. *Plant Systematics and Evolution* 275: 31.

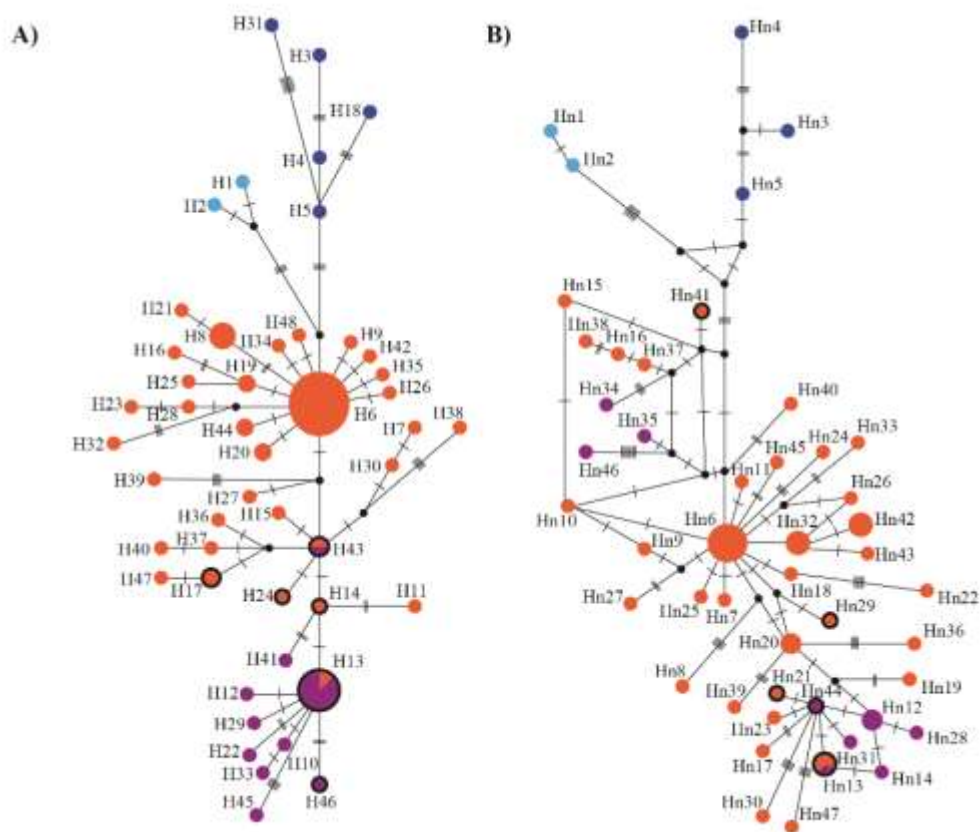

**Figure S1.** (A) cpDNA (*matK* and *rps16-trnK*) and (B) *PHYC* median joining networks showing genetic divergence among *Vriesea* pollination groups. Colors represent hummingbird (orange) and bat (purple) syndromes. The outgroup *Alcantarea* and *Stigmatodon* is shown in blue. Each circle represents a haplotype with the size proportional to its total frequency. Haplotypes of *Vriesea* species with floral traits distinct from the typical hummingbird and bat-pollinated flowers (mixed floral types) are circled in black. Mutational steps are indicated with dashes and hypothetical haplotypes with black dots. See codes in Table 1.

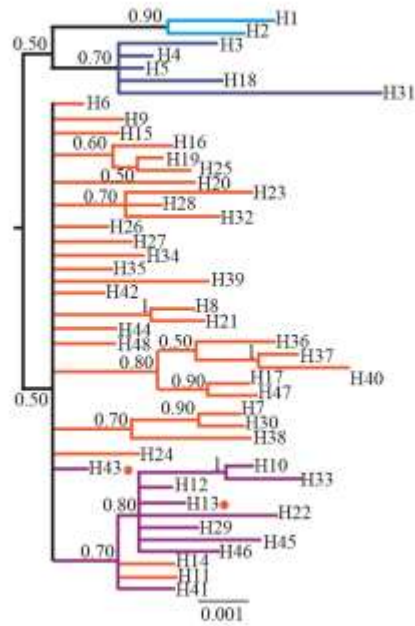

**Figure S2.** Bayesian phylogeny of cpDNA haplotypes (*matK* and *rps16-trnK*) for 83 taxa, including 76 *Vriesea* accessions. Posterior probabilities above 0.50 are shown. Colors represent hummingbird (orange) and bat (purple) syndromes in *Vriesea*. The outgroup *Alcantarea* and *Stigmatodon* is indicated in blue. The phylogeny of cpDNA haplotypes was generally unresolved. Haplotypes from genus *Vriesea* formed a clade poorly supported (PP = 0.50). Five hummingbird-pollinated clades emerged, including the highly supported *V. corcovadensis* group (H17- 47, PP = 0.90). Another clade of bat-pollinated species was resolved (H10-11-12-13-14-22-29-33-41-45-46, PP=0.70), but also included *V. botafogensis*, *V. billbergioides* and *V. cacuminis* (hummingbird-pollinated). See codes in Table 1.



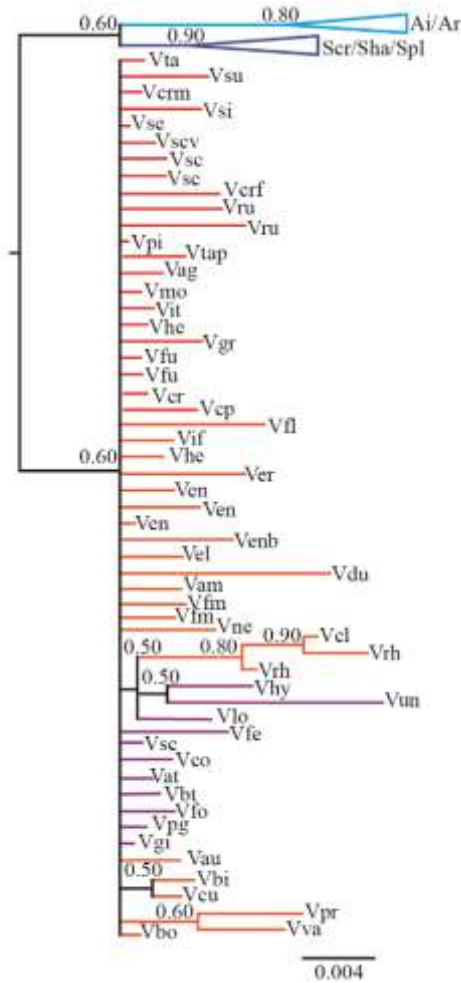

**Figure S3:** Bayesian phylogeny based on *PHYC* dataset for 60 taxa, including 55 *Vriesea* accessions. Posterior probabilities above 0.50 are shown. Colors represent hummingbird (orange) and bat (purple) syndromes in *Vriesea*. The outgroup *Alcantarea* and *Stigmatodon* is indicated in blue. *Vriesea* is poorly supported as monophyletic (PP = 0.60). The few clades with support higher than 0.50 PP constitute groupings of morphologically similar species within each syndrome. A clade comprising *V. rhodostachys* (Vrh) and *V. calimaniiana* (Vcl) form a geographic group as they occur in adjacent areas (PP = 0.80). See codes in Table 1.

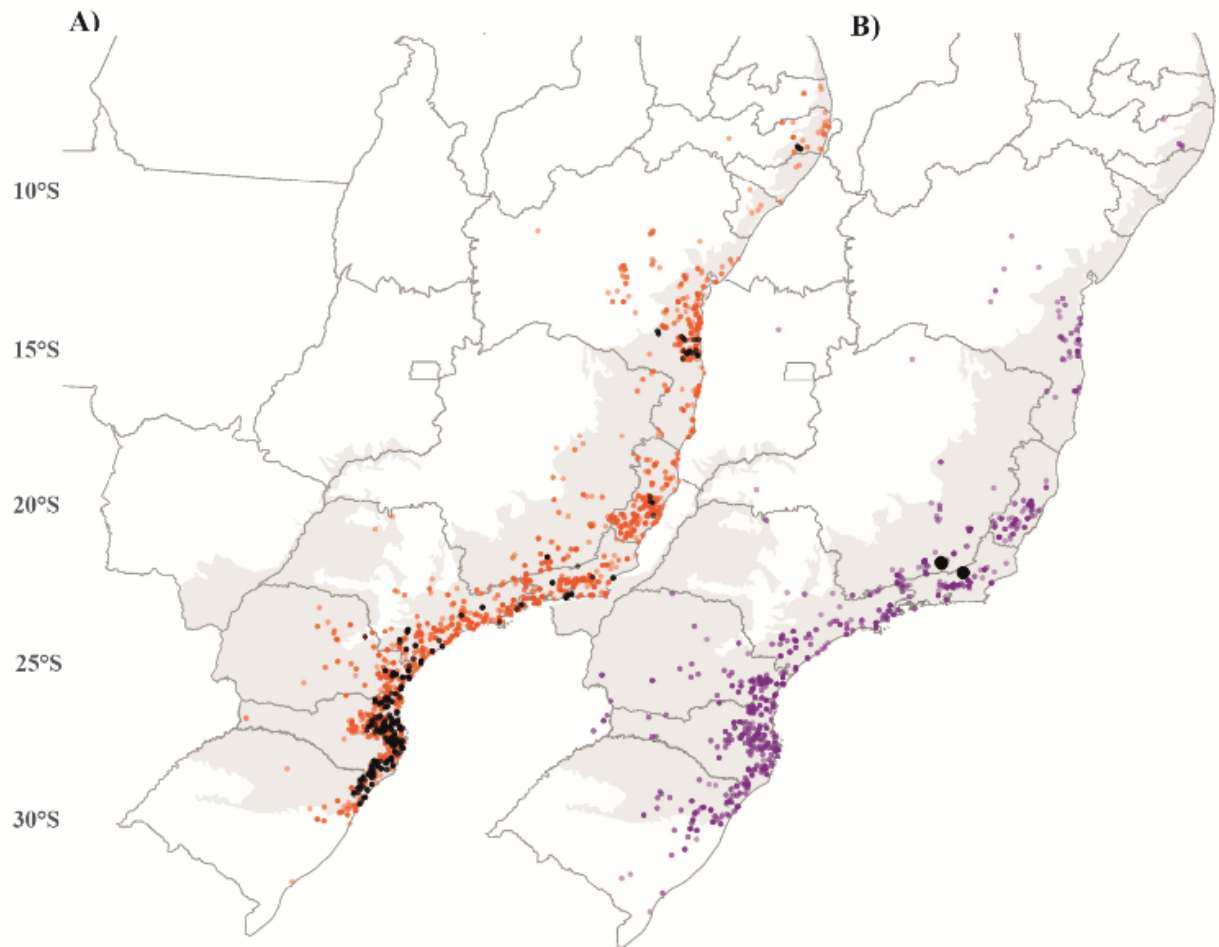

**Figure S4:** Map of Brazil with geographic distribution of (A) hummingbird (orange) and (B) bat-pollinated (purple) *Vriesea* species along the Atlantic Forest (in gray). Species with floral traits distinct from the typical hummingbird and bat-pollinated flowers (mixed floral types) in black circles. Records from the dataset compiled in Ramos *et al.* (2018) for the Atlantic Forest epiphytes, complemented with our personal collections and the taxonomic revisions of Moura (2011) and Uribe *et al.* (2020).

### Literature Cited

- Moura RL. 2011. Revisão Taxonômica do Grupo *Vriesea platynema* Gaudich. (Bromeliaceae). Tese de Doutorado. Universidade Federal do Rio de Janeiro, Rio de Janeiro. 194p.
- Ramos FN, Mortara SR, Monalisa-Francisco N, *et al.* 2019. Atlantic epiphytes: a data set of vascular and non-vascular epiphyte plants and lichens from the Atlantic Forest. *Ecology* 100: e02541.
- Uribe FP, Neves B, Jacques, SSA, Costa AF. 2020. Morphological variation in the *Vriesea procera* complex (Bromeliaceae, Tillandsioideae) in the Brazilian Atlantic Rainforest, with recognition of new taxa. *Systematic Botany* 45: 53–68.
